# Supplementary material for: Controlled tuning of radiative–nonradiative transition via solvent perturbation: Franck–Condon emission vs. aggregation caused quenching
Source: Royal Society of Chemistry journal article supplement (doi:10.1039/d2cp02305a), 2022-01-01
Supplement: d2cp02305a1.pdf [file d2cp02305a1.pdf]

## Electronic Supplementary Information (ESI)

### Controlled tuning of radiative–nonradiative transition via solvent perturbation: Franck–Condon emission vs. aggregation caused quenching

Provakar Paul,<sup>a</sup> Monaj Karar,<sup>a</sup> Bibhas Mondal,<sup>b</sup> Ujjal Kanti Roy,<sup>b</sup> Ashutosh Ghosh,<sup>c</sup> Tapas Majumdar\*\*<sup>a</sup> and Arabinda Mallick\*<sup>b</sup>

<sup>a</sup>Department of Chemistry, University of Kalyani, Nadia, West Bengal, India – 741235.

<sup>b</sup>Department of Chemistry, Kazi Nazrul University, Asansol, West Bengal, India – 713340.

<sup>c</sup>Department of Chemical Sciences, Indian Institute of Science Education and Research (IISER)–Kolkata, Mohanpur, West Bengal, India – 741246.

Email: <sup>a</sup>tapasmju@gmail.com; <sup>b</sup>ampcju@yahoo.co.in

| Contents:                                 | Pages  |
|-------------------------------------------|--------|
| 1. Synthetic outline                      | S2     |
| 2. <sup>1</sup> H-NMR                     | S2     |
| 3. <sup>13</sup> C-NMR                    | S3     |
| 4. Experimental and computational results | S4-S10 |

## 1. Synthetic outline:

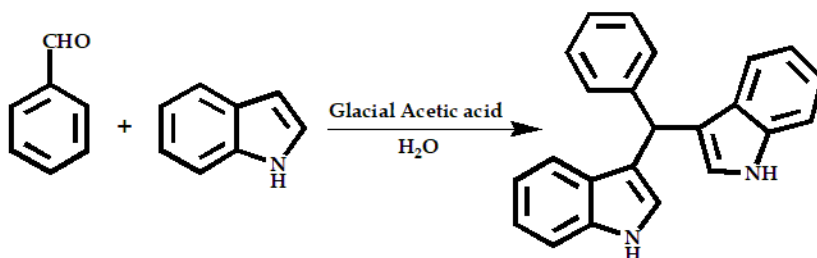

**Scheme S1** Synthetic outline for 3,3'-bisindolyl(phenyl)methane (BIPM).

## 2. <sup>1</sup>H-NMR:

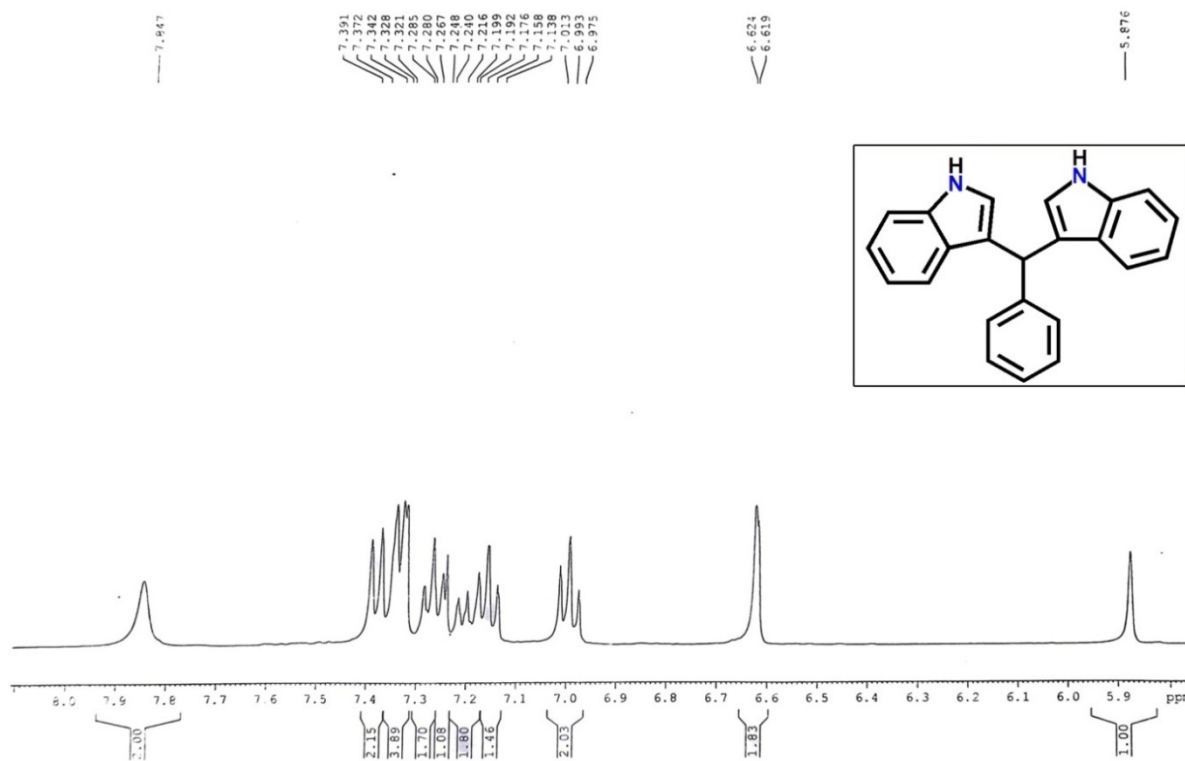

**Fig. S1** <sup>1</sup>H-NMR (400 MHz, CDCl<sub>3</sub>): δ (ppm) 7.85 (brs, 2H, -NH), 7.39–7.14 (m, 11H, -ArH), 6.99 (t, 2H, J=15.2 Hz, -ArH), 6.62 (d, 2H, J=2 Hz, -ArH), 5.88 (s, 1H, -CH).

### 3. $^{13}\text{C}$ -NMR:

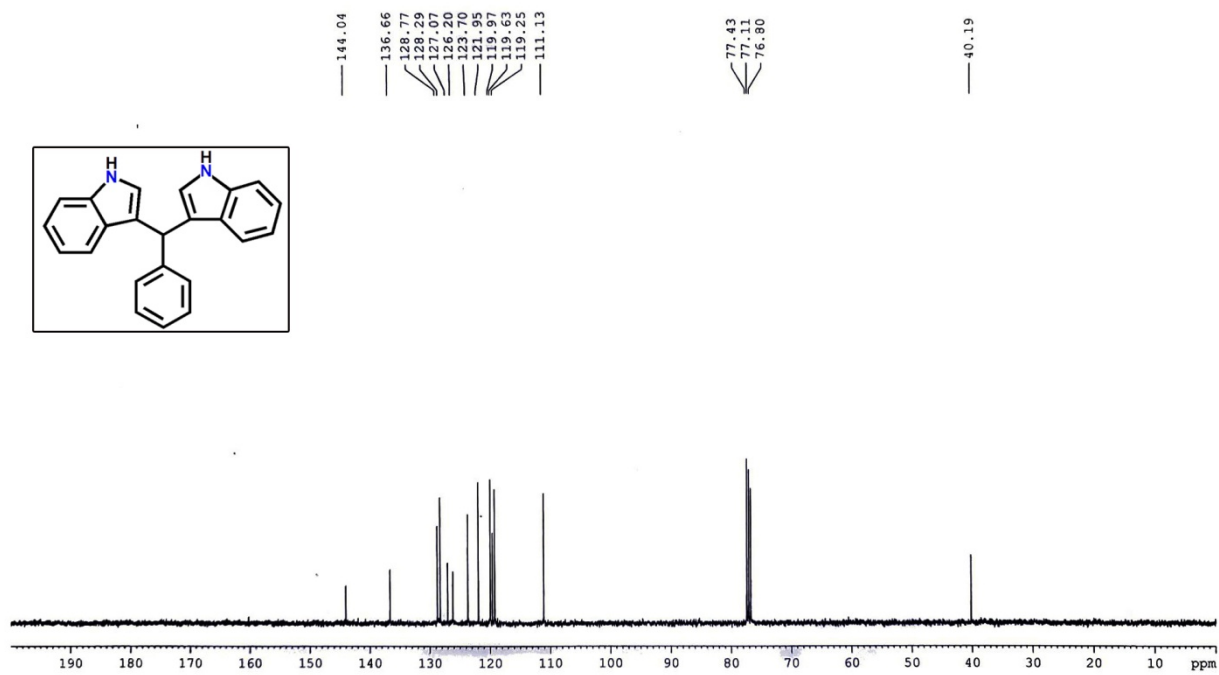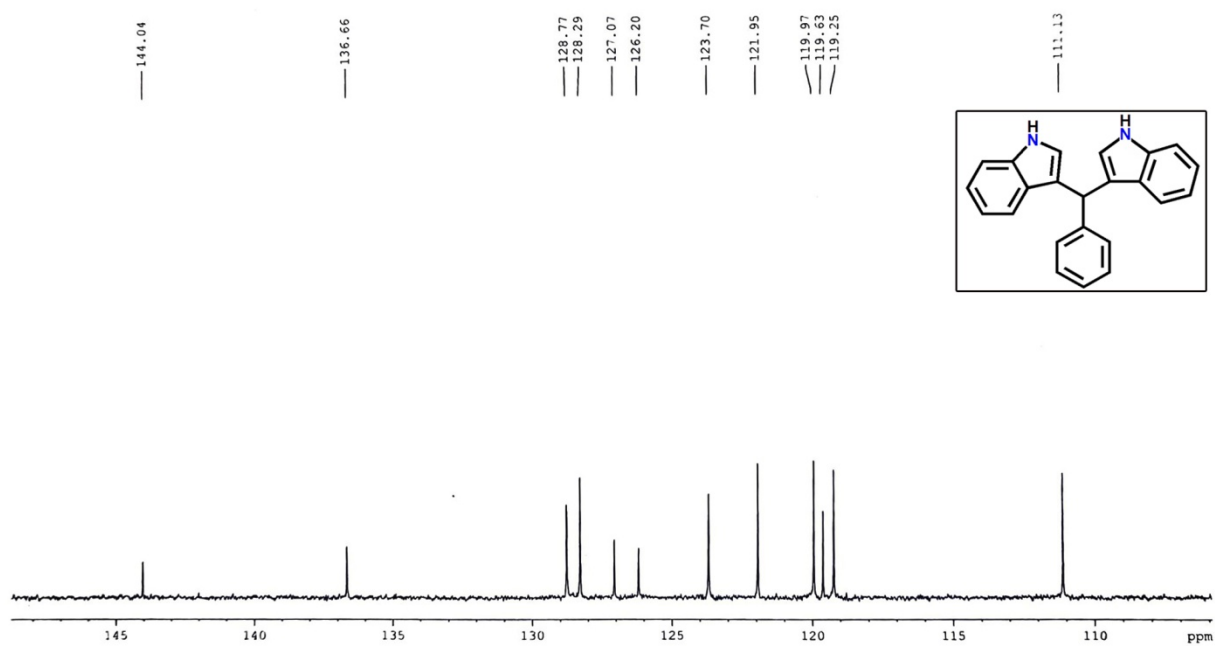

**Fig. S2**  $^{13}\text{C}$ -NMR of BIPM (100 MHz,  $\text{CDCl}_3$ ):  $\delta$  (ppm) 144.0, 136.7, 128.8, 128.3, 127.1, 126.2, 123.7, 122.0, 120.0, 119.6, 119.3, 111.1, 40.2.

#### 4. Experimental and computational results:

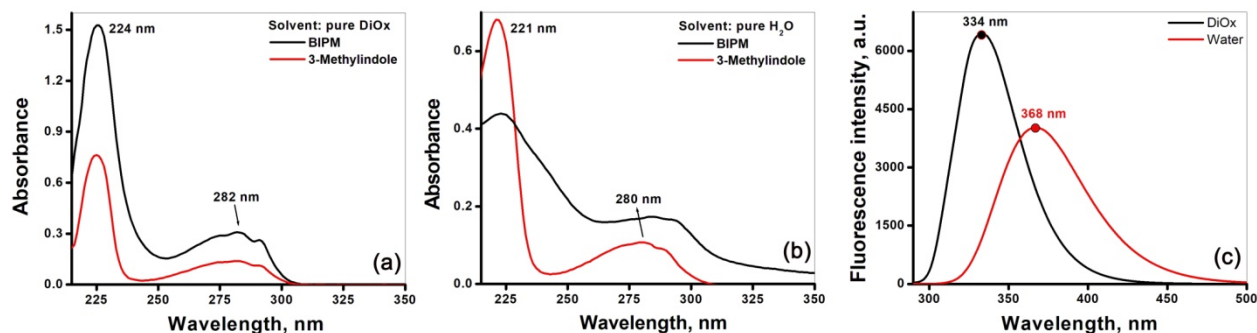

**Fig. S3** Comparisons of the absorption spectra of BIPM and 3-methylindole in pure (a) DiOx and (b) H<sub>2</sub>O; (c) fluorescence spectra of 3-methylindole in pure DiOx and H<sub>2</sub>O.  $\lambda_{\text{ex}} = 280$  nm, [BIPM] = 22.4  $\mu\text{M}$  and [3-methylindole] = 22.4, Temp. 298 K.

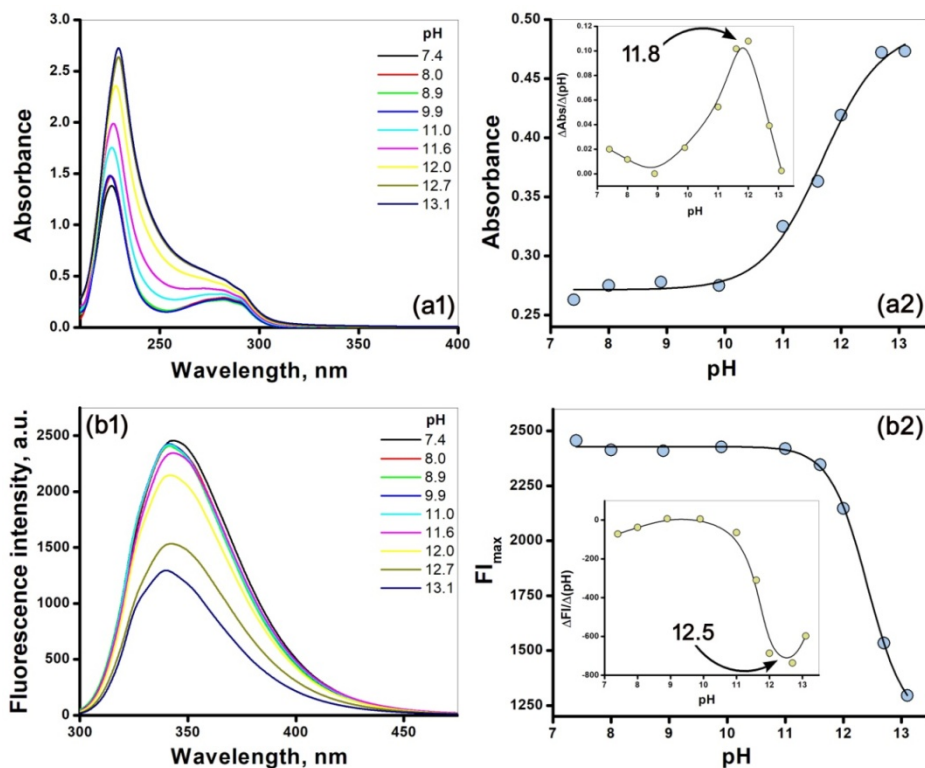

**Fig. S4** (a1) Absorption and (b1) fluorescence pH titration curves for BIPM at 40% f<sub>w</sub>; plots (a2) and (b2) show the sigmoidal changes in the absorbance value at 282 nm and fluorescence intensity at emission maxima with pH (corresponding derivative plots in the insets), respectively.  $\lambda_{\text{ex}} = 280$  nm, [BIPM] = 22.44  $\mu\text{M}$ , Temp. 298 K.

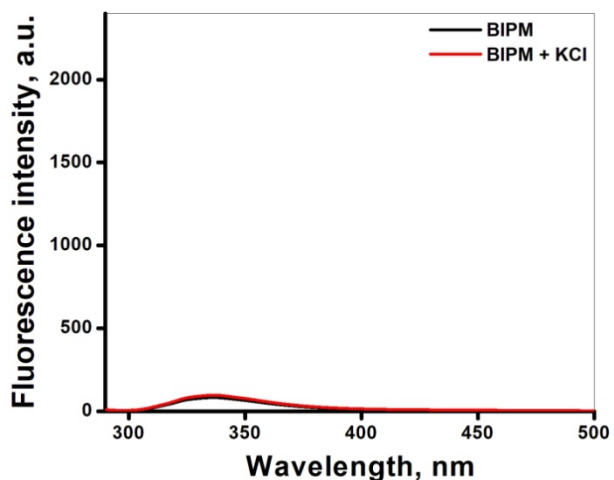

**Fig. S5** Fluorescence spectra of BIPM in presence and absence of KCl at 13.1 pH in the solvent system of 100%  $f_w$ .  $\lambda_{ex} = 280$  nm, [BIPM] = 22.44  $\mu$ M, Temp. 298 K.

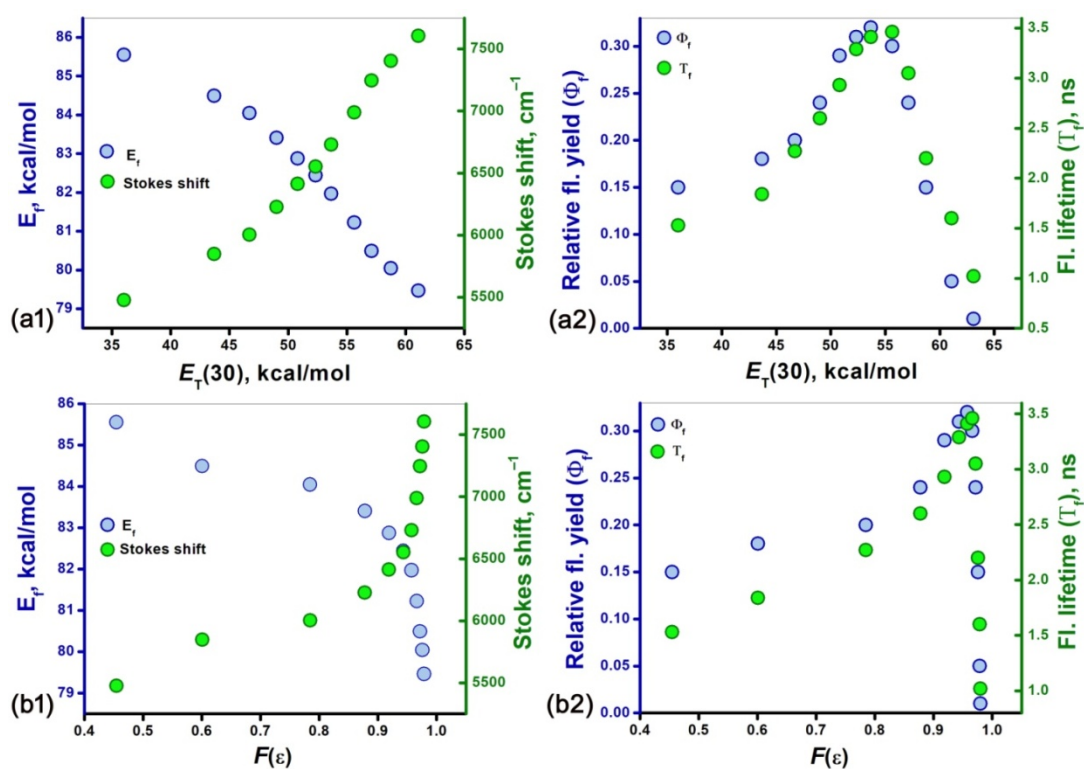

**Fig. S6** Plots of energy of fluorescence, Stokes shift, relative fluorescence yield and fluorescence lifetime against the (a) Reichardt's solvent polarity parameter,  $E_T(30)$  and (b) Onsager's solvation function,  $F(\epsilon)$ .

**Z-Average (d.nm):** 248.4      **Peak 1:** 279.7      **% Intensity:** 99.1      **St Dev (d.n...)** 111.3  
**Pdl:** 0.176      **Peak 2:** 5110      **% Intensity:** 0.9      **St Dev (d.n...)** 539.2  
**Intercept:** 0.938      **Peak 3:** 0.000      **% Intensity:** 0.0      **St Dev (d.n...)** 0.000  
**Result quality :** Good

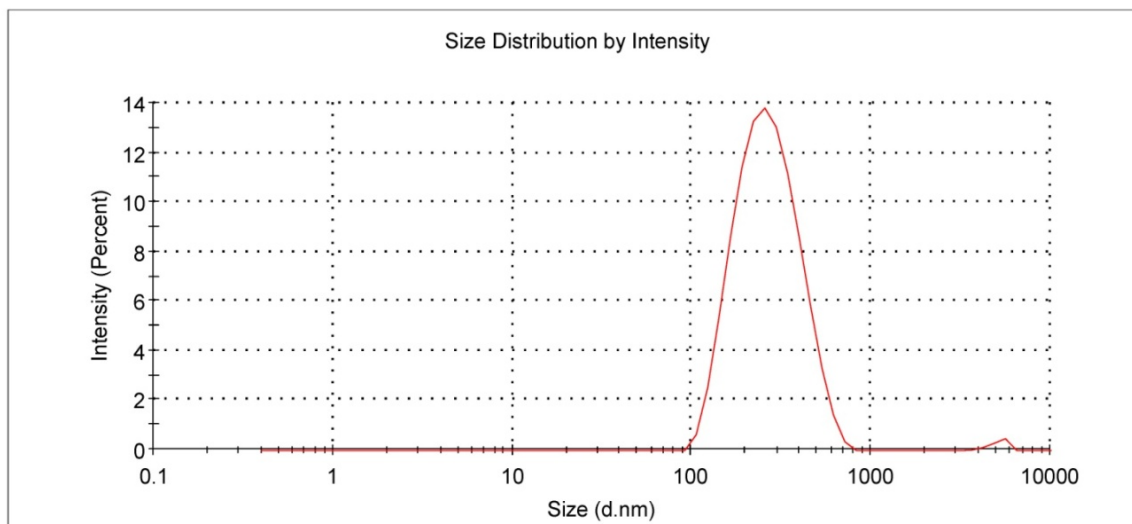

**Fig. S7** Particle size distribution of BIPM-aggregates in pure H<sub>2</sub>O from DLS measurement. [BIPM] = 22.44 μM; Temp. 298 K.

**Table S1** Optimized energies of S<sub>0</sub> and S<sub>1</sub>-states of BIPM in pure DiOx and pure H<sub>2</sub>O.

| Solvent          | S <sub>0</sub> (au) | S <sub>1</sub> (au) | S <sub>0</sub> -S <sub>1</sub> (kJ mol <sup>-1</sup> ) | μ (S <sub>0</sub> ), Debye | μ (S <sub>1</sub> ), Debye |
|------------------|---------------------|---------------------|--------------------------------------------------------|----------------------------|----------------------------|
| DiOx             | -996.77926002       | -996.62491282       | 405.1614                                               | 3.67                       | 3.50                       |
| H <sub>2</sub> O | -996.78882239       | -996.64103655       | 388.0117                                               | 4.61                       | 5.78                       |

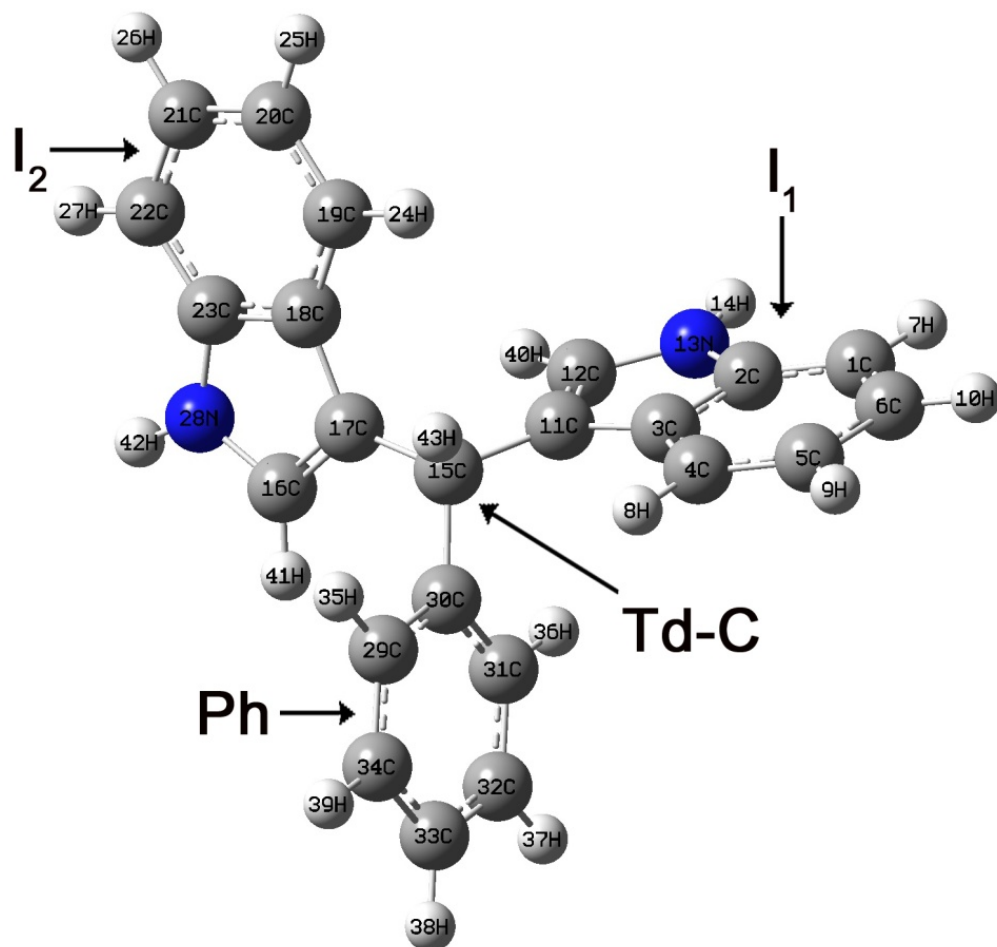

**Fig. S8** Optimized geometry of BIPM ( $S_0$ ) showing the atom numbers.

**Table S2** Atomic and group NBO charges of the  $S_0$  and  $S_1$  states of BIPM in pure DiOx. The atom numbers and the groups were according to Fig. S8.

| DiOx ( $S_0$ )                   |        |               |        |               |        |               |        |
|----------------------------------|--------|---------------|--------|---------------|--------|---------------|--------|
| I-1                              |        | I-2           |        | Ph            |        | Td-C          |        |
| Atom no.                         | Charge | Atom no.      | Charge | Atom no.      | Charge | Atom no.      | Charge |
| H8                               | +0.210 | H24           | +0.212 | H36           | +0.215 | H43           | +0.222 |
| H9                               | +0.203 | H25           | +0.204 | H37           | +0.205 | C15           | -0.265 |
| H10                              | +0.203 | H26           | +0.203 | H38           | +0.204 |               |        |
| H7                               | +0.209 | H27           | +0.209 | H39           | +0.205 |               |        |
| H14                              | +0.411 | H43           | +0.411 | H35           | +0.206 |               |        |
| H40                              | +0.220 | H41           | +0.220 | C30           | -0.002 |               |        |
| C11                              | -0.086 | C17           | -0.082 | C31           | -0.214 |               |        |
| C3                               | -0.090 | C18           | -0.092 | C32           | -0.198 |               |        |
| C4                               | -0.193 | C19           | -0.194 | C33           | -0.211 |               |        |
| C5                               | -0.228 | C20           | -0.229 | C34           | -0.200 |               |        |
| C6                               | -0.209 | C21           | -0.209 | C29           | -0.206 |               |        |
| C1                               | -0.240 | C22           | -0.240 |               |        |               |        |
| C2                               | +0.156 | C23           | +0.155 |               |        |               |        |
| N13                              | -0.548 | N28           | -0.542 |               |        |               |        |
| C12                              | -0.003 | C16           | -0.005 |               |        |               |        |
| <b>Total gr. charge = +0.015</b> |        | <b>+0.021</b> |        | <b>+0.004</b> |        | <b>-0.043</b> |        |
| DiOx ( $S_1$ )                   |        |               |        |               |        |               |        |
| I-1                              |        | I-2           |        | Ph            |        | Td-C          |        |
| Atom no.                         | Charge | Atom no.      | Charge | Atom no.      | Charge | Atom no.      | Charge |
| H8                               | +0.213 | H24           | +0.216 | H36           | +0.216 | H43           | +0.218 |
| H9                               | +0.203 | H25           | +0.205 | H37           | +0.205 | C15           | -0.269 |
| H10                              | +0.201 | H26           | +0.205 | H38           | +0.204 |               |        |
| H7                               | +0.210 | H27           | +0.210 | H39           | +0.205 |               |        |
| H14                              | +0.411 | H43           | +0.409 | H35           | +0.206 |               |        |
| H40                              | +0.225 | H41           | +0.224 | C30           | -0.004 |               |        |
| C11                              | -0.089 | C17           | -0.081 | C31           | -0.212 |               |        |
| C3                               | -0.099 | C18           | -0.104 | C32           | -0.198 |               |        |
| C4                               | -0.194 | C19           | -0.192 | C33           | -0.211 |               |        |
| C5                               | -0.226 | C20           | -0.235 | C34           | -0.199 |               |        |
| C6                               | -0.216 | C21           | -0.212 | C29           | -0.208 |               |        |
| C1                               | -0.237 | C22           | -0.231 |               |        |               |        |
| C2                               | +0.150 | C23           | +0.151 |               |        |               |        |
| N13                              | -0.534 | N28           | -0.544 |               |        |               |        |
| C12                              | -0.007 | C16           | -0.001 |               |        |               |        |
| <b>Total gr. Charge = +0.011</b> |        | <b>+0.020</b> |        | <b>+0.004</b> |        | <b>-0.051</b> |        |



**Table S3** Atomic and group NBO charges of the  $S_0$  and  $S_1$  states of BIPM in pure  $H_2O$ . The atom numbers and the groups were according to Fig. S8.

| Water ( $S_0$ )                   |        |               |        |               |        |               |        |
|-----------------------------------|--------|---------------|--------|---------------|--------|---------------|--------|
| I-1                               |        | I-2           |        | Ph            |        | Td-C          |        |
| Atom no.                          | Charge | Atom no.      | Charge | Atom no.      | Charge | Atom no.      | Charge |
| H8                                | +0.212 | H24           | +0.213 | H36           | +0.217 | H43           | +0.224 |
| H9                                | +0.207 | H25           | +0.208 | H37           | +0.210 | C15           | -0.267 |
| H10                               | +0.208 | H26           | +0.208 | H38           | +0.210 |               |        |
| H7                                | +0.218 | H27           | +0.218 | H39           | +0.211 |               |        |
| H14                               | +0.424 | H43           | +0.424 | H35           | +0.210 |               |        |
| H40                               | +0.224 | H41           | +0.224 | C30           | -0.002 |               |        |
| C11                               | -0.090 | C17           | -0.087 | C31           | -0.220 |               |        |
| C3                                | -0.097 | C18           | -0.097 | C32           | -0.201 |               |        |
| C4                                | -0.205 | C19           | -0.203 | C33           | -0.216 |               |        |
| C5                                | -0.235 | C20           | -0.235 | C34           | -0.202 |               |        |
| C6                                | -0.218 | C21           | -0.218 | C29           | -0.212 |               |        |
| C1                                | -0.240 | C22           | -0.240 |               |        |               |        |
| C2                                | 0.152  | C23           | +0.151 |               |        |               |        |
| N13                               | -0.540 | N28           | -0.539 |               |        |               |        |
| C12                               | -0.002 | C16           | -0.005 |               |        |               |        |
| <b>Total gr. Charge = +0.018</b>  |        | <b>+0.022</b> |        | <b>+0.005</b> |        | <b>-0.043</b> |        |
| Water ( $S_1$ )                   |        |               |        |               |        |               |        |
| I-1                               |        | I-2           |        | Ph            |        | Td-C          |        |
| Atom no.                          | Charge | Atom no.      | Charge | Atom no.      | Charge | Atom no.      | Charge |
| H8                                | +0.210 | H24           | +0.210 | H36           | 0.218  | H43           | +0.233 |
| H9                                | +0.208 | H25           | +0.208 | H37           | 0.210  | C15           | -0.279 |
| H10                               | +0.208 | H26           | +0.208 | H38           | 0.210  |               |        |
| H7                                | +0.219 | H27           | +0.219 | H39           | 0.210  |               |        |
| H14                               | +0.423 | H43           | +0.423 | H35           | 0.218  |               |        |
| H40                               | +0.222 | H41           | +0.222 | C30           | -0.008 |               |        |
| C11                               | -0.080 | C17           | -0.080 | C31           | -0.214 |               |        |
| C3                                | -0.108 | C18           | -0.108 | C32           | -0.203 |               |        |
| C4                                | -0.202 | C19           | -0.202 | C33           | -0.215 |               |        |
| C5                                | -0.236 | C20           | -0.237 | C34           | -0.203 |               |        |
| C6                                | -0.227 | C21           | -0.227 | C29           | -0.214 |               |        |
| C1                                | -0.233 | C22           | -0.233 |               |        |               |        |
| C2                                | +0.145 | C23           | +0.145 |               |        |               |        |
| N13                               | -0.533 | N28           | -0.533 |               |        |               |        |
| C12                               | -0.003 | C16           | -0.005 |               |        |               |        |
| <b>Total gr. charge = + 0.013</b> |        | <b>+0.010</b> |        | <b>+0.009</b> |        | <b>-0.046</b> |        |

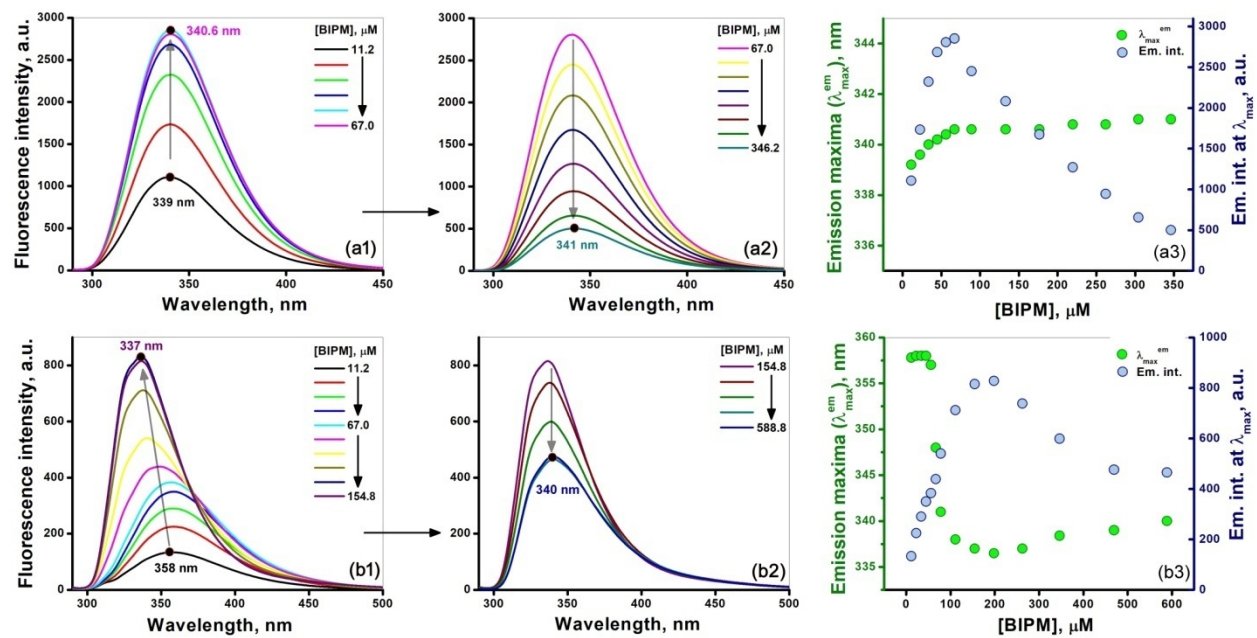

**Fig. S9** Changes in the fluorescence response of BIPM upon gradual increase in its concentration in the solvent systems with (a) 10% and (b) 90%  $f_w$ .  $\lambda_{ex} = 280$  nm, Temp. 298 K.
